# Supplementary material
Source: publisher figshare collection journal article supplement (https://gsapubs.figshare.com/ndownloader/files/23318606)
Supplement: Supplementary file 1 [file 23318606]

## Sheet: Sheet1—Iron Speciation
	Al	Fe		Acetate Fe	Dithionite Fe	Oxalate Fe	Pyrite Fe		FeT/Al	FeHR/FeT	Fepy/FeHR
Sample ID	Wt %	Wt %		Wt %	Wt %	Wt %	Wt %
M0.6	3.63343	1.45711		0.531818	0.616116		0		0.401029	0.787815	0
M1.5		0.684683		0.276683	0.39851		0			0.986138	0
M2.75		0.72338		0.576382	0.155601		0			1.01189	0
M3.25	3.10432	2.13063		0.493478	0.177541		0		0.686344	0.314939	0
M4.25		1.10431		0.522642	0.308116		0.0178976			0.768492	0.0210894
M5.5	1.79486	1.37864		0.525253	0.153944		0		0.768102	0.492659	0
M6.5	2.89481	2.00534		0.608738	0.190427		0		0.692736	0.398518	0
M7.07	12.9327	4.88243		0.470464	0.151857		0		0.377526	0.127461	0
M8.25	1.25872	1.20246		0.513333	0.661613		0		0.955302	0.977119	0
M9.55	1.02919	0.733551		0.461307	0.245829		0.0128196		0.712749	0.981466	0.017806
M10.25	0.912576	0.683679		0.571123	0.0747941		0		0.749175	0.944767	0
M11		0.25		0	0.2703		0			1.08	0
M12		0.72		0.565445	0.169704		0			1.03	0
M13.2	1.16864	0.859145		0.380383	0.329287		0		0.735167	0.826018	0
M14		0.972928		0.524701	0.142064		0			0.685318	0
M15		0.857716		0.286557	0.304586		0			0.689206	0
M16		0.865002		0.621348	0.156011		0			0.898679	0
M17.25	2.19191	1.01447		0.306321	0.357598		0		0.462825	0.65445	0
M18.24	0.775451	1.89101		0.269948	0.592618		0		2.43859	0.45614	0
M19.24		0.886418		0.599605	0.144883		0			0.839884	0
M20.5	0.419693	2.89898		0.577885	0.164567		0		6.90737	0.256108	0
M22.5	4.47421	6.29666		0.701523	0.143604		0		1.40732	0.134218	0
M24.6	3.40343	4.77587		0.623243	1.30824		0.0221128		1.40325	0.409056	0.011319
M26.95	2.55736	2.15354		0.333239	0.984972		0		0.842095	0.612113	0
M27.75		2.35272		0.626702	0.165306		0			0.336635	0
A0.9	15.3677	3.44304		0.675743	0.914356		0.0330394		0.224044	0.471425	0.0203553
A2.1	7.88276	3.50216		0.463484	0.473126		0		0.44428	0.267438	0
A5.1		5.14648		0.484324	0.481081		0			0.187585	0
A6.3	35.563	13.3813		0.811486	0.599662	0.0969257	0.0311202		0.376271	0.115026	0.0202185
A7.5	3.63785	4.31058		0.505	0.42685		0		1.18493	0.216178	0
A8.1	10.4033	10.6178		0.291471	3.57347		0		1.02062	0.364007	0
A10.2	3.96892	3.07767		0.857838	1.04541		0		0.775442	0.618404	0
A11.7	3.53268	3.23155		0.427171	0.511222		0		0.914759	0.290384	0
A13.2	6.03236	2.30896		0.300051	0.276731		0		0.382762	0.249802	0
A14.7	3.67477	8.23598		1.03392	0.1053	0.07837	0		2.24123	0.147838	0
A16.4	1.33771	5.20028		0.336425	0.207957	0.0260814	0		3.88744	0.109699	0
A17	2.81978	4.45971		0.435238	0.429	0.00858201	0		1.58158	0.195712	0
A18.5	2.41385	0.957852		0.569849	0.163251		0		0.396815	0.765359	0
A19.1	0.661698	1.34739		0.377143	0.154631		0		2.03627	0.394669	0
A20.3	1.09539	2.09043		0.328659	0.199329		0		1.90839	0.252574	0
A21.85	0.625862	0.762007		0.279574	0.230293		0		1.21753	0.66911	0
A22.15	0.928867	0.922373		0.580586	0.105692		0		0.993009	0.744036	0
A23.7		0.830756		0.300913	0.346718		0.0034118			0.783674	0.00524052
A24		0.432243		0.312917	0.0748807		0			0.897174	0
A25.2	0.650874	0.762128		0.481379	0.0948276		0		1.17093	0.75605	0
A25.5	0.389844	0.49856		0.500883	0.0156656		0		1.27887	1.03608	0
A26.7		0.463576		0.336073	0.177215		0			1.10724	0
A27.5	2.02026	1.1693		0.277238	0.216388		0		0.578785	0.422156	0
A28	2.58545	1.0142		0.244167	0.183371		0		0.392273	0.42155	0
A28.3		0.468953		0.388217	0.0855048		0			1.01017	0

## Sheet: Sheet2—ICP-MS results
	Final Concentration
	Mg	Al	Ti	V	Cr	Fe	Co	Ni	Cu	Zn	Mo	U		Fe/Al
Sample ID	Wt %	Wt %	ppm	ppm	ppm	Wt %	ppm	ppm	ppm	ppm	ppm	ppm
M0.6	0.528079	3.63343	1485.22	28.0737	36.6386	1.45711	5.97889	14.8434	1.79619	37.9719	0.788123	0.0944831		0.401029
M1.5	-	-	1224.84	23.9496	32.1245	0.684683	5.2509	16.6589	1.0334	34.0844	0.694206	0.0830472
M2.75	-	-	939.904	21.2273	26.696	0.72338	4.37308	14.1211	0.860933	28.897	0.591168	0.0693777
M3.25	4.03055	3.10432	891.036	23.5673	25.3967	2.13063	4.13113	11.0714	1.07402	28.5642	0.544818	0.0654963		0.686344
M4.25	0.901093	-	1356.11	26.5625	37.208	1.10431	6.05755	16.2665	0.787618	38.2526	0.862326	0.0962351
M5.5	0.48839	1.79486	1269.44	25.4272	33.7861	1.37864	5.51605	12.9278	1.0543	34.4959	0.747858	0.0872689		0.768102
M6.5	0.374288	2.89481	1178.92	25.4876	27.4333	2.00534	4.51183	12.1558	0.812865	28.9097	0.820855	0.0719503		0.692736
M7.07	0.276424	12.9327	1964.27	38.0642	37.1623	4.88243	6.60059	11.2112	0.143465	37.4216	0.823306	0.0962979		0.377526
M8.25	0.352948	1.25872	1329.97	30.1586	37.0974	1.20246	6.01992	14.78	0.558567	37.7554	0.834985	0.0979621		0.955302
M9.55	0.431915	1.02919	1211.9	25.211	34.6323	0.733551	5.63645	14.7709	0.741645	36.0281	0.851064	0.089645		0.712749
M10.25	0.511245	0.912576	1132.1	29.5273	32.7948	0.683679	5.30725	12.9628	0.442549	33.3905	0.724891	0.0850437		0.749175
M11	0.526736	-	1269.1	24.8233	37.097	0.25	6.03571	17.442	0.54827	38.4779	0.806052	0.0959511
M12	-	-	1058.92	21.2769	31.5188	0.72	5.15185	16.813	0.428172	32.452	0.686657	0.0818402
M13.2	0.230342	1.16864	874.589	18.6025	24.7041	0.859145	4.02959	12.2166	0.584217	25.6019	0.536654	0.0636506		0.735167
M14	0.694935	-	906.53	18.753	25.8313	0.972928	4.24321	14.7162	0.773497	28.5025	1.40636	0.0666782
M15	0.386704	-	645.974	19.1041	19.4912	0.857716	3.21269	10.9653	0.243964	20.989	0.614643	0.0507185
M16	0.441164	-	1051.82	24.8095	31.4698	0.865002	5.09623	13.6825	0.429229	34.5976	0.747487	0.0812919
M17.25	0.838294	2.19191	1117.98	29.554	32.7948	1.01447	5.30522	14.261	0.325283	33.352	0.780026	0.0842852		0.462825
M18.24	0.426311	0.775451	1093.85	24.6988	30.8197	1.89101	4.98762	8.9763	-0.0859119	30.8841	0.668033	0.0794826		2.43859
M19.24	-	-	1064.28	27.6641	31.3754	0.886418	5.12157	16.3498	0.270955	34.1167	0.718541	0.0811037
M20.5	-	0.419693	1252.11	25.6854	29.5254	2.89898	4.85377	14.8431	1.00248	32.9066	0.711478	0.0762333		6.90737
M22.5	0.318801	4.47421	14375	40.125	34.1912	6.29666	6.00679	9.84163	0.0227234	34.1629	0.722285	0.0875283		1.40732
M24.6	0.232702	3.40343	1150.72	25.1752	22.7136	4.77587	3.87942	6.53024	0.00393445	22.7637	0.480972	0.0581942		1.40325
M26.95	0.231103	2.55736	1299.51	24.4937	24.0798	2.15354	3.95679	9.79231	0.669614	25.7937	0.527804	0.0616436		0.842095
M27.75	0.717371	-	1469.54	29.0858	30.8347	2.35272	5.08474	13.4198	0.842263	32.6575	0.676784	0.0792658
A0.9	-	15.3677	1513.55	56.4702	25.5323	3.44304	4.18355	10.4313	2.72984	26.6283	0.518548	0.0626815		0.224044
A2.1	0.41594	7.88276	1030.53	41.0145	24.4161	3.50216	3.91486	6.87951	-0.0219436	23.7461	0.499216	0.0606779		0.44428
A5.1	0.498969	-	834.062	34.5977	23.5391	5.14648	3.834	10.9273	0.0992187	26.6555	0.501562	0.060332
A6.3	0.836493	35.563	2796.75	66.3733	40.4378	13.3813	6.63657	15.4285	5.4284	43.1917	0.847753	0.10011		0.376271
A7.5	0.4914	3.63785	853.923	36.4454	23.6423	4.31058	3.80714	11.786	0.927308	24.1868	0.496154	0.0597692		1.18493
A8.1	-	10.4033	2088.62	40.5459	30.8071	10.6178	5.69236	16.3087	9.32648	32.7097	0.717058	0.0774035		1.02062
A10.2	-	3.96892	1271.49	33.5887	29.9862	3.07767	4.84414	13.6233	1.27729	30.8718	0.631884	0.0759982		0.775442
A11.7	0.353963	3.53268	990.318	29.1299	19.7826	3.23155	3.1896	5.65296	0.153998	19.4594	0.410126	0.0497459		0.914759
A13.2	-	6.03236	1126.83	27.0394	26.4309	2.30896	4.28079	10.9982	1.08842	27.0239	0.557585	0.0672625		0.382762
A14.7	11.0997	3.67477	983.723	54.2305	25.1869	8.23598	3.97794	10.3684	10.5043	25.204	0.515187	0.0604361		2.24123
A16.4	12.9289	1.33771	864.342	25.8262	19.5679	5.20028	3.17991	9.97077	0.619768	20.9483	0.417633	0.0501513		3.88744
A17	7.77821	2.81978	1251.65	26.0371	27.7289	4.45971	4.56066	14.875	8.6527	31.1617	0.619505	0.0714057		1.58158
A18.5	-	2.41385	1099.11	24.6843	26.2707	0.957852	4.28353	12.2255	1.23729	26.6401	0.553498	0.0667858		0.396815
A19.1	0.282306	0.661698	1136.98	38.2285	32.1632	1.34739	5.13699	9.19415	-0.0647171	31.798	0.673036	0.0818993		2.03627
A20.3	9.97904	1.09539	953.354	22.6682	26.3976	2.09043	4.25031	11.0671	1.21091	27.1954	0.563417	0.0675664		1.90839
A21.85	0.329433	0.625862	911.462	24.996	26.689	0.762007	4.27769	7.76398	0.0385292	26.503	0.561224	0.0681518		1.21753
A22.15	0.478822	0.928867	779.627	20.1963	22.4764	0.922373	3.617	9.51247	0.901251	22.6148	0.474469	0.0572425		0.993009
A23.7	-	-	1148.27	25.3819	32.8342	0.830756	5.3125	16.6818	0.864393	33.477	0.705838	0.0840386
A24	-	-	851.324	25.4934	23.6526	0.432243	3.8271	12.373	0.226246	24.1359	0.503115	0.0604361
A25.2	0.28771	0.650874	896.809	25.1359	26.4904	0.762128	4.2665	11.3978	0.48809	26.7108	0.564685	0.0677229		1.17093
A25.5	0.301736	0.389844	841.175	28.6551	24.5944	0.49856	3.9621	10.7073	0.154019	24.7675	0.522794	0.0631084		1.27887
A26.7	-	-	752.499	16.4637	22.4045	0.463576	3.69827	15.7142	0.510889	22.8826	0.501193	0.0577454
A27.5	0.650848	2.02026	1280.81	32.4558	35.4736	1.1693	5.71894	14.8855	1.12718	36.1126	0.756362	0.091541		0.578785
A28	0.454364	2.58545	1197.73	31.5852	35.3466	1.0142	5.55218	14.5504	0.30483	35.211	0.730682	0.0880682		0.392273
A28.3	-	-	838.125	19.1029	24.6386	0.468953	3.95789	11.6359	0.14894	24.7842	0.521442	0.0628655
SCO - 1	1.58144	7.09019	3810.86	126.588	68.1151	3.59019	11.0569	27.7355	29.5808	104.13	1.44264	3.38989		0.50636
Reported	1.64	7.25	3777	130	68	3.59	11	27	29	100	1.4			0.495172
% Error	96.429	97.7958	100.896	97.3756	100.169	100.005	100.517	102.724	102.003	104.13	103.046			1.02259

## Sheet: Sheet4—Grain size analysis
	15.6	15.6—31	31—63	63—100	100
M0.6	21.26	13.8391	30.4299	44.0771	17.0527
M1.5	62.92	20.8037	13.7769	12.9158	0.299491
M2.75	48.53	20.7122	18.921	21.7592	5.53354
M3.25	48.17	16.5033	12.8788	15.4614	17.4981
M4.25	58.25	19.3674	17.1413	18.0429	1.07401
M5.5	55.36	26.3667	16.5193	14.2966	0.0643162
M6.5	31.9	7.0021	10.4401	20.2771	39.6522
M7.07	38.47	12.3178	14.515	22.2145	24.9065
M8.25	51.87	26.4398	15.6608	14.453	3.53304
M9.55	65.12	20.2899	13.1661	11.537	0.00354719
M10.25	82.71	12.904	4.30117	3.09385	0
M11	52.37	25.9943	16.0173	15.5461	2.49464
M12	54.62	23.805	15.3657	15.5377	2.71609
M13.2	60.43	23.9041	13.1099	12.0384	0.504695
M14	76.7	11.2782	6.26985	7.86907	2.95519
M15	40.08	11.6566	12.3906	18.5583	27.9256
M16	48.79	25.9439	18.0712	18.6905	2.75363
M17.25	36.8	14.058	15.6795	23.1305	23.704
M18.24	60.48	18.511	15.5583	16.4242	1.54811
M19.24	48.6	27.0885	18.3251	17.8414	2.40036
M20.5	26.07	7.77917	23.0639	43.0013	21.4749
M22.5	35.17	6.69631	16.7687	32.5803	24.2482
M24.6	18.3	1.29008	1.07567	9.07094	71.3374
M26.95	15.12	2.11422	2.87607	4.56449	77.7129
M27.75	2.92	0.983445	0.496987	5.75346	90.2284
A0.9	16.13	11.5353	36.2025	49.2187	18.7608
A2.1	57.16	18.8885	18.629	19.8021	0.758089
A5.1	36.43	17.0848	23.6263	33.7255	9.66731
A6.3	24.09	6.95011	27.2107	46.8138	19.9693
A7.5	25.48	12.2832	17.9068	30.536	29.5622
A8.1	16.26	7.83506	26.0424	45.9507	27.6955
A10.2	40.36	17.2784	16.4304	18.7006	20.5734
A11.7	42.03	18.9786	20.3489	22.6373	12.6835
A13.2	14.12	5.71009	4.80613	6.76914	72.373
A14.7	24.75	6.84105	12.2398	30.713	36.9612
A16.4	21.35	8.93444	30.945	52.315	15.0053
A17	74.88	11.328	3.74753	3.93642	8.8883
A18.5	33.17	14.5716	23.6379	35.5125	13.7078
A19.1	50.01	18.4374	11.3641	16.459	12.9951
A20.3	69.89	10.9871	9.77611	13.2465	4.27347
A21.85	1.29	0.719534	0.346112	5.86217	92.078
A23.7	55.6	11.7519	21.5651	26.8739	2.83331
A25.2	35.75	4.61514	21.3583	41.448	17.0619
A26.7	60.73	15.1253	11.0792	15.7698	6.54439
A27.5	78.89	13.9405	6.64522	5.43183	0.00108713
A28.3	55.34	10.9852	15.3204	24.0169	7.9195

## Sheet: Sheet5—biomarker
	C27S βα 20S	C27S βα 20R	C27S αβ 20S	C27S αβ 20R	C27 ααα 20S	C27 αββ 20S+R	C27 ααα 20R	C28S βα 20S	C28S βα 20R	C28S αβ 20S	C28S αβ 20R	C28S ααα 20S	C28S αββ 20S+R	C28S ααα 20R	C29S βα 20S	C29S βα 20R	C29S αβ 20S	C29S αβ 20R	C29S ααα 20S	C29S αββ 20S+R	C29S ααα 20R	C30S βα 20S	C30S βα 20R	C30S αβ 20S	C30S ααα 20S	C30S αββ 20S+R	C30S ααα 20R	C27H Ts	C27H Tm	C28H 29,30Nor	C28H 28,30Nor	C29H Dia	C29H	C30H	Ga	C31H	C32H	C31H 2-methyl	C31H 3-methyl	C32H 2-methyl	C32H 3-methyl		Sterane/Hopane	C27 Dia/reg	C29 Dia/Reg	Ts/Tm	C29/C30H	2-Methyl Index	3-methyl Index
M3.25	18968	12106	3329	4557	2403	3369	2458	10771	5808	1988	2274	808	2383	950	7047	4740	1574	1183	1066	2021	922	831	689	180	133	231	76	11107	6444	689	920	2931	10863	8988	782	3612	1992	424	370	302	194	M3.25	3.19612	4.7339	3.62784	1.72362	1.20861	5.448	4.28441
A 10.2	37448	24507	8085	10703	15177	20551	14202	27062	17614	6025	7439	7929	19767	11071	17395	11595	3118	4250	8133	15506	7723	1826	1727	525	811	1534	851	42885	6917	7428	13725	6971	77123	63334	2509	40311	18245	3192	2454	2864	2226	A 10.2	1.43361	1.61712	1.1593	6.19994	1.21772	5.52046	4.32033
A 13.2	11045	7079	2046	3075	2932	4464	2902	7253	4874	1407	1595	1090	2576	1258	6186	3702	971	949	2421	4964	1875	415	301	106	96	204	117	25452	24767	10286	1402	3706	47382	33968	2282	23098	10398	4276	711	3882	697	A 13.2	0.6298	2.25723	1.27516	1.02766	1.3949	12.5077	2.40791
A 25.5	292	163	109	96	105	252	119	245	168	80	77	103	230	124	214	154			226	304	139							2503	2494	516	86	124	4950	5393	203	4282	2157	218	311	294	332	A 25.5	0.189282	1.38655	0.550075	1.00361	0.917856	5.02601	6.23183
A 28.3	3451	2320	715	1039	1627	2413	1511	2435	1612	585	810	795	1843	1003	2391	1463	500	640	1522	3093	1277	183	165	65	70	164	103	40879	37536	7288	1531	1104	73617	83241		60645	27915	5988	4368	6074	4645	A 28.3	0.134045	1.35561	0.84759	1.08906	0.884384	7.73463	5.89474
A 28.6	34533	23896	8008	12222	15199	25802	14252	22215	15036	6233	6603	5773	15506	7122	35006	22879	7651	7863	21370	46366	19891	2563	2201	815	1393	2640	1156	492096	375397	89630	7381	16704	1003762	1117806		959119	494732	96694	68438	107997	80971	A 28.6	0.103957	1.42362	0.83763	1.31087	0.897975	8.97132	6.71099
[truncated: 1 more columns]

## Sheet: Sheet6—Point Counting
	autotrophic	autotrophic	autotrophic	autotrophic	autotrophic	autotrophic	autotrophic	symbiont	heterotroph	heterotroph	heterotroph	heterotroph	heterotroph	heterotroph	abiotic	abiotic	abiotic	abiotic	abiotic	abiotic
	cyanobacteria	clotted micrite	tubyphyte	green algae	phylloid algae	red algae	encrustation	fusulinid	foraminifera	coral	crinoid	brachiopod	bryozoans	gastropod	peloid	micrite	marine cement	ooid	intraclast	quartz	sum	Acetate Fe	Dithionite Fe	Oxalate Fe	Pyrite Fe	FeT/Al	FeHR/FeT	Fepy/FeHR	Fe	FeA/FeT	FeD/FeT	autotrophic	symbiont	heterotroph	abiotic	meterage	interval
M0.6	0	385	0	0	0	0	0	1	0	0	4	0	10	0	0	0	0	0	0	0	400	0.531818	0.616116		0	0.401029	0.787815	0	1.45711	0.364981	0.422834	385	1	14	0	0.6	M
M1.5	0	400	0	0	0	0	0	0	0	0	0	0	0	0	0	0	0	0	0	0	400	0.276683	0.39851		0		0.986138	0	0.684683	0.404103	0.582035	400	0	0	0	1.5	M
M2.75	0	323	24	0	0	0	0	0	0	0	0	12	41	0	0	0	0	0	0	0	400	0.576382	0.155601		0		1.01189	0	0.72338	0.79679	0.215102	347	0	53	0	2.75	M
M3.25	0	276	53	0	0	0	13	0	0	0	0	15	43	0	0	0	0	0	0	0	400	0.493478	0.177541		0	0.686344	0.314939	0	2.13063	0.231611	0.0833279	342	0	58	0	3.25	M
M4.25	0	216	3	39	0	0	142	0	0	0	0	0	0	0	0	0	0	0	0	0	400	0.522642	0.308116		0.0178976		0.768492	0.0210894	1.10431	0.473274	0.279011	400	0	0	0	4.25	M
M5.5	0	240	0	0	0	0	0	0	0	0	0	0	160	0	0	0	0	0	0	0	400	0.525253	0.153944		0	0.768102	0.492659	0	1.37864	0.380995	0.111664	240	0	160	0	5.5	M
M6.5	42	0	0	62	9	0	139	2	9	0	33	16	4	20	0	16	0	21	20	7	400	0.608738	0.190427		0	0.692736	0.398518	0	2.00534	0.303558	0.09496	252	2	82	57	6.5	M
M7.07	0	0	0	12	0	0	0	0	13	0	9	21	3	0	0	277	0	0	0	65	400	0.470464	0.151857		0	0.377526	0.127461	0	4.88243	0.0963586	0.0311027	12	0	46	277	7.07	M
M8.25	28	0	0	112	3	0	121	5	10	0	8	8	0	0	0	105	0	0	0	0	400	0.513333	0.661613		0	0.955302	0.977119	0	1.20246	0.426903	0.550217	264	5	26	105	8.25	M
M9.55	81	0	0	61	15	0	86	8	0	59	64	26	0	0	0	0	0	0	0	0	400	0.461307	0.245829		0.0128196	0.712749	0.981466	0.017806	0.733551	0.628868	0.335122	243	8	149	0	9.55	M
M10.25	36	24	0	142	22	0	77	10	0	0	72	15	0	2	0	0	0	0	0	0	400	0.571123	0.0747941		0	0.749175	0.944767	0	0.683679	0.835367	0.109399	301	10	89	0	10.25	M
M11	15	0	0	91	3	0	140	40	0	0	36	49	4	2	0	20	0	0	0	0	400	0	0.2703		0		1	0	0.101144	0	2.67243	249	40	91	20	11	M
M12	15	0	0	7	0	0	127	50	18	0	43	93	0	0	0	43	0	0	4	0	400	0.565445	0.169704		0		1	0	0.0912337	6.19777	1.8601	149	50	154	47	12	M
M13.2	0	96	0	23	0	0	140	16	0	0	14	79	25	7	0	0	0	0	0	0	400	0.380383	0.329287		0	0.735167	0.826018	0	0.859145	0.442745	0.383273	259	16	125	0	13.2	M
M14	34	21	0	98	0	0	137	14	0	0	16	48	24	4	0	4	0	0	0	0	400	0.524701	0.142064		0		0.685318	0	0.972928	0.539301	0.146017	290	14	92	4	14	M
M15	0	0	0	105	0	0	145	84	0	0	37	16	0	0	0	11	2	0	0	0	400	0.286557	0.304586		0		0.689206	0	0.857716	0.334093	0.355113	250	84	53	13	15	M
M16	0	0	0	92	16	0	119	35	0	0	43	49	6	13	0	11	0	0	16	0	400	0.621348	0.156011		0		0.898679	0	0.865002	0.71832	0.180359	227	35	111	27	16	M
M17.25	0	0	0	114	7	0	97	13	0	0	22	29	1	31	0	9	0	9	68	0	400	0.306321	0.357598		0	0.462825	0.65445	0	1.01447	0.301952	0.352498	218	13	83	86	17.25	M
M18.24	3	0	0	83	6	0	93	24	0	0	75	61	4	6	0	17	0	0	28	0	400	0.269948	0.592618		0	2.43859	0.45614	0	1.89101	0.142753	0.313387	185	24	146	45	18.24	M
M19.24	16	0	0	117	14	0	112	35	0	0	42	46	1	3	0	2	0	0	12	0	400	0.599605	0.144883		0		0.839884	0	0.886418	0.676435	0.163448	259	35	92	14	19.24	M
M20.5	3	0	0	45	3	0	21	15	0	0	16	23	3	2	0	1	0	261	7	0	400	0.577885	0.164567		0	6.90737	0.256108	0	2.89898	0.199341	0.0567674	72	15	44	269	20.5	M
M22.5	0	0	0	13	1	0	15	2	1	0	26	30	0	0	0	4	31	274	3	0	400	0.701523	0.143604		0	1.40732	0.134218	0	6.29666	0.111412	0.0228064	29	2	57	312	22.5	M
M24.6	1	0	0	20	0	0	15	7	0	0	33	22	6	0	0	0	16	280	0	0	400	0.623243	1.30824		0.0221128	1.40325	0.409056	0.011319	4.77587	0.130498	0.273928	36	7	61	296	24.6	M
M26.95	11	0	0	25	0	0	24	13	0	0	19	32	0	0	0	0	19	257	0	0	400	0.333239	0.984972		0	0.842095	0.612113	0	2.15354	0.15474	0.457373	60	13	51	276	26.95	M
M27.75	0	0	0	8	0	0	0	1	0	0	14	36	0	0	0	3	4	58	101	175	400	0.626702	0.165306		0		0.336635	0	2.35272	0.266373	0.0702617	8	1	50	166	27.75	M
A0.9	0	0	0	0	0	0	31	40	0	0	40	167	0	0	0	20	0	0	0	102	400	0.675743	0.914356		0.0330394	0.224044	0.471425	0.0203553	3.44304	0.196263	0.265566	31	40	207	20	0.9	A
A2.1	0	0	0	27	2	95	63	47	24	0	44	60	27	11	0	0	0	0	0	0	400	0.463484	0.473126		0	0.44428	0.267438	0	3.50216	0.132343	0.135096	187	47	166	0	2.1	A
A5.1	0	0	0	20	8	30	25	115	18	0	92	71	18	3	0	0	0	0	0	0	400	0.484324	0.481081		0		0.187585	0	5.14648	0.0941078	0.0934776	83	115	202	0	5.1	A
A6.3	0	0	0	0	0	0	0	0	0	0	0	28	0	0	0	0	0	0	0	372	400	0.811486	0.599662	0.0969257	0.0311202	0.376271	0.115026	0.0202185	13.3813	0.0606432	0.0448134	0	0	28	0	6.3	A
A7.5	0	0	0	19	1	0	48	48	34	0	46	195	4	5	0	0	0	0	0	0	400	0.505	0.42685		0	1.18493	0.216178	0	4.31058	0.117154	0.0990239	68	48	284	0	7.5	A
A8.1	0	0	0	16	0	0	0	0	0	0	40	95	2	0	0	30	0	0	0	217	400	0.291471	3.57347		0	1.02062	0.364007	0	10.6178	0.0274512	0.336556	16	0	137	30	8.1	A
A10.2	0	0	0	62	37	17	41	45	7	0	25	29	21	20	0	0	0	66	30	0	400	0.857838	1.04541		0	0.775442	0.618404	0	3.07767	0.27873	0.339674	157	45	102	96	10.2	A
A11.7	0	0	0	16	5	7	65	146	47	0	31	67	7	1	0	4	0	0	4	0	400	0.427171	0.511222		0	0.914759	0.290384	0	3.23155	0.132187	0.158197	93	146	153	8	11.7	A
A13.2	0	0	0	3	0	4	10	26	19	0	62	153	38	1	0	44	0	34	6	0	400	0.300051	0.276731		0	0.382762	0.249802	0	2.30896	0.129951	0.119851	17	26	273	84	13.2	A
A14.7	0	0	0	0	0	0	25	63	0	0	32	25	0	0	0	196	0	0	7	52	400	1.03392	0.1053	0.07837	0	2.24123	0.147838	0	8.23598	0.125537	0.0127853	25	63	57	203	14.7	A
A16.4	0	0	0	0	0	0	6	56	0	0	3	12	0	0	0	272	0	0	0	51	400	0.336425	0.207957	0.0260814	0	3.88744	0.109699	0	5.20028	0.0646937	0.0399896	6	56	15	272	16.4	A
A17	0	0	0	0	0	0	0	73	0	0	0	0	0	0	0	327	0	0	0	0	400	0.435238	0.429	0.00858201	0	1.58158	0.195712	0	4.45971	0.0975934	0.0961947	0	73	0	327	17	A
A18.5	0	0	0	159	0	17	17	24	16	0	81	59	3	0	0	24	0	0	0	0	400	0.569849	0.163251		0	0.396815	0.765359	0	0.957852	0.594924	0.170435	193	24	159	24	18.5	A
A19.1	111	0	0	6	5	0	17	91	8	0	113	39	2	0	0	0	0	0	8	0	400	0.377143	0.154631		0	2.03627	0.394669	0	1.34739	0.279906	0.114763	139	91	162	8	19.1	A
A20.3	28	0	0	35	1	0	37	62	31	0	60	27	6	3	0	0	0	99	11	0	400	0.328659	0.199329		0	1.90839	0.252574	0	2.09043	0.15722	0.0953532	101	62	127	110	20.3	A
A21.85	215	0	0	0	0	0	3	91	6	0	18	62	5	0	0	0	0	0	0	0	400	0.279574	0.230293		0	1.21753	0.66911	0	0.762007	0.366892	0.302218	218	91	91	0	21.85	A
A23.7	238	0	0	0	0	0	6	109	2	0	22	23	0	0	0	0	0	0	0	0	400	0.300913	0.346718		0.0034118		0.783674	0.00524052	0.830756	0.362216	0.417352	244	109	47	0	23.7	A
A25.2	198	0	0	0	0	0	0	97	2	0	29	74	0	0	0	0	0	0	0	0	400	0.481379	0.0948276		0	1.17093	0.75605	0	0.762128	0.631625	0.124425	198	97	105	0	25.2	A
A26.7	193	0	0	15	0	0	0	103	8	0	41	38	0	0	0	0	0	0	2	0	400	0.336073	0.177215		0		1.10724	0	0.463576	0.724958	0.382277	208	103	87	2	26.7	A
A27.5	11	0	0	9	0	0	0	11	16	0	10	1	0	0	342	0	0	0	0	0	400	0.277238	0.216388		0	0.578785	0.422156	0	1.1693	0.237098	0.185058	20	11	27	342	27.5	A
A28.3	197	0	0	13	0	0	0	79	15	0	55	39	2	0	0	0	0	0	0	0	400	0.388217	0.0855048		0		1.01017	0	0.468953	0.827837	0.182331	210	79	111	0	28.3	A
